# Supplementary material
Source: PubMed Central journal article supplement (PMC6233806)

## Supplementary Online Content

Papanastasiou E, Mouchlianitis E, Joyce DW, et al. Examination of the neural basis of psychotic-like experiences in adolescence. *JAMA Psychiatry*. Published online August 1, 2018.  
doi:10.1001/jamapsychiatry.2018.1973

**eFigure 1.** MID Study, ROIs selected for analysis, Illustration (Coronal View)

**eFigure 2.** MID Study, ROIs selected for analysis, Illustration (Sagittal View)

**eFigure 3.** MID Study, ROIs selected for analysis, Illustration (Axial View)

**eTable 1.** MID Study, fROI Brain Analysis

**eTable 2.** MID Study, fROIs Factorial Analysis, Mixed Model 2-Way ANOVA

**eTable 3.** MID Study, Exploratory Cross-Sectional Analysis, Independent T-Tests

**eTable 4.** MID Study, Exploratory Longitudinal Analysis, Paired T-Tests

**eTable 5.** CANTAB Measures Exploratory Cross-Sectional Analysis, Independent T-Tests

**eTable 6.** CANTAB Measures Exploratory Longitudinal Analysis, Paired T-Tests

**eFigure 4.** CANTAB Measures: Mean AGN Total Omissions Positive and Negative Stimuli Scores at age 14 and 19

This supplementary material has been provided by the authors to give readers additional information about their work.

eFigure 1. MID Study, ROIs selected for analysis, Illustration (Coronal View)

**BASELINE** [33 41 40] Right Middle Frontal Gyrus (L>H); [33 44 31] Right Middle Frontal Gyrus (L>H); [-12 -28 40] Left Cingulate Gyrus (L>H);  
[-36 47 31] Left Middle Frontal Gyrus (L>H)

**FOLLOW-UP** [9 8 1] Right Caudate Head (L>H)

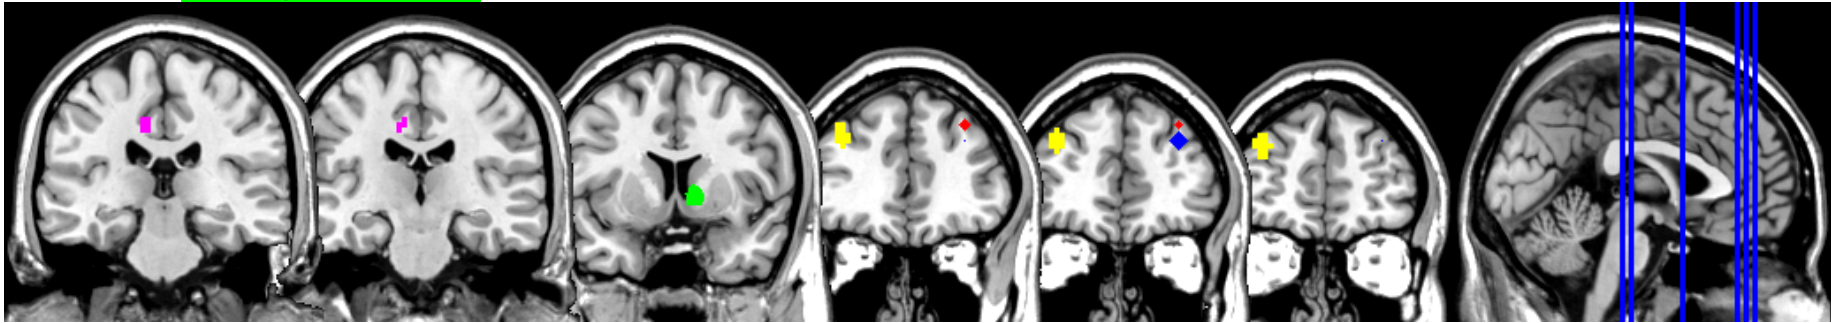

**Coronal View**

Horizontal Axis: Left=Left, Right=Right

Vertical Axis: Up=Superior, Down=Inferior

eFigure 2. MID Study, ROIs selected for analysis, Illustration (Sagittal View)

**BASELINE** [33 41 40] Right Middle Frontal Gyrus (L>H); [33 44 31] Right Middle Frontal Gyrus (L>H); [-12 -28 40] Left Cingulate Gyrus (L>H);  
[-36 47 31] Left Middle Frontal Gyrus (L>H)

**FOLLOW-UP** [9 8 1] Right Caudate Head (L>H)

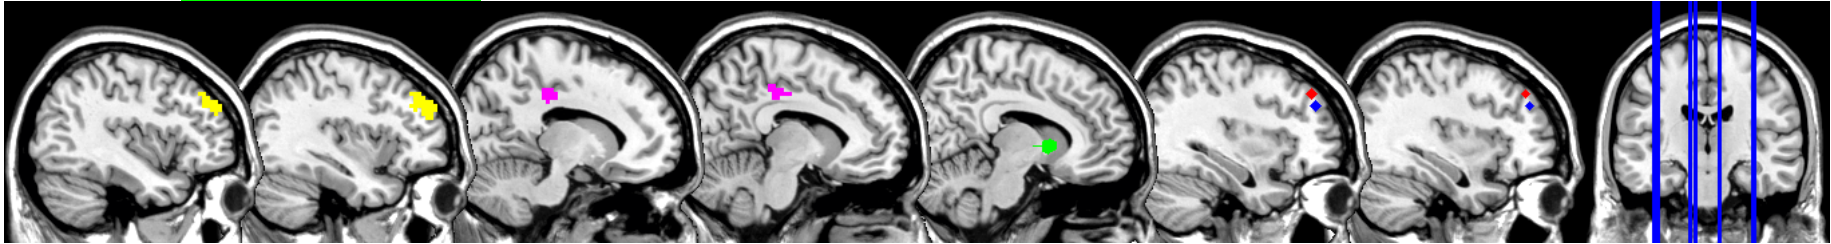

**Sagittal View**

Horizontal Axis: Left=Posterior, Right=Anterior

Vertical Axis: Up=Superior, Down=Inferior

eFigure 3. MID Study, ROIs selected for analysis, Illustration (Axial View)

**BASELINE** [33 41 40] Right Middle Frontal Gyrus (L>H); [33 44 31] Right Middle Frontal Gyrus (L>H); [-12 -28 40] Left Cingulate Gyrus (L>H);  
[-36 47 31] Left Middle Frontal Gyrus (L>H)  
**FOLLOW-UP** [9 8 1] Right Caudate Head (L>H)

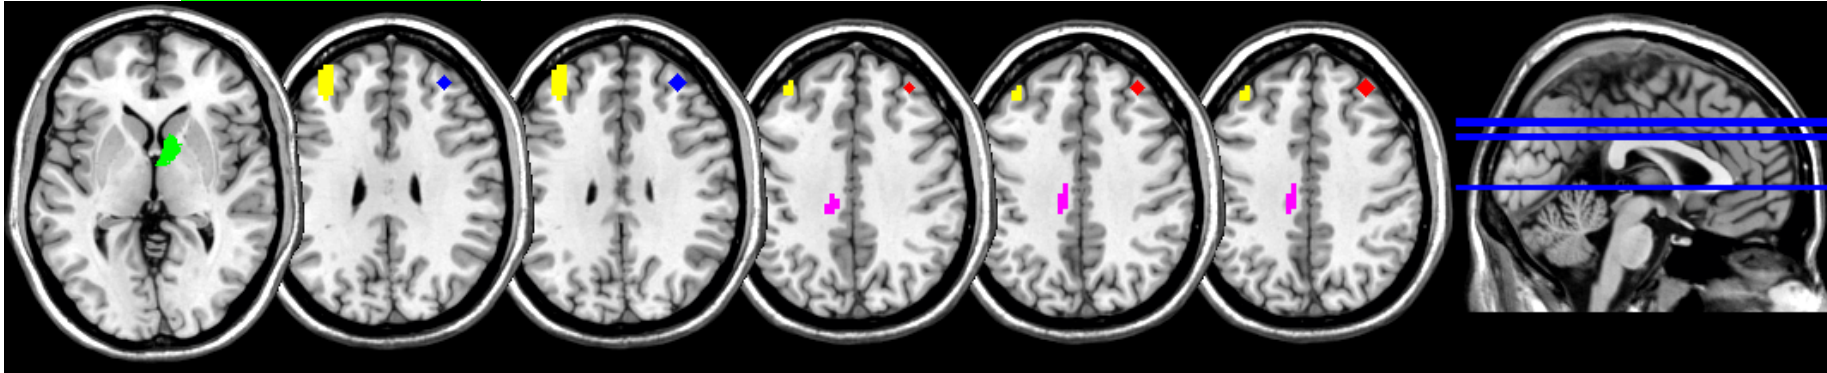

**Axial View**

Horizontal Axis: Left=Left, Right=Right

Vertical Axis: Up=Anterior, Down=Posterior

**eTable 1. MID Study, fROI Brain Analysis**

| Time-Point                                                                                                                                                                                                                                                                                                                                                                                                                                                                                                                                                                                                                                                                                                                                                                                                                                    | Contrast           | Analysis               | MNI coordinates |     |    | Anatomical Area                                  | K    | p(FEW-corr) Cluster Level | p(FEW-corr) Peak Level | T score | Z score |
|-----------------------------------------------------------------------------------------------------------------------------------------------------------------------------------------------------------------------------------------------------------------------------------------------------------------------------------------------------------------------------------------------------------------------------------------------------------------------------------------------------------------------------------------------------------------------------------------------------------------------------------------------------------------------------------------------------------------------------------------------------------------------------------------------------------------------------------------------|--------------------|------------------------|-----------------|-----|----|--------------------------------------------------|------|---------------------------|------------------------|---------|---------|
|                                                                                                                                                                                                                                                                                                                                                                                                                                                                                                                                                                                                                                                                                                                                                                                                                                               |                    |                        | X               | Y   | Z  |                                                  |      |                           |                        |         |         |
| FU                                                                                                                                                                                                                                                                                                                                                                                                                                                                                                                                                                                                                                                                                                                                                                                                                                            | Anticipation LW-NW | Group Average Positive | 9               | 8   | 1  | Right Caudate Head                               | 1073 | <0.0001                   | <0.0001                | 11.67   | Inf.    |
| BL                                                                                                                                                                                                                                                                                                                                                                                                                                                                                                                                                                                                                                                                                                                                                                                                                                            | Feedback LW-NW     | Low>High               | 33              | 41  | 40 | Right Frontal Lobe, Middle Frontal Gyrus, BA09   | 1    | 0.015*                    | 0.037*                 | 5.04    | 4.88    |
| BL                                                                                                                                                                                                                                                                                                                                                                                                                                                                                                                                                                                                                                                                                                                                                                                                                                            | Feedback LW-NW     | Group Average Negative | 33              | 44  | 31 | Right Frontal Lobe, Middle Frontal Gyrus, BA09   | 1    | 0.015*                    | 0.05*                  | 4.98    | 4.82    |
| BL                                                                                                                                                                                                                                                                                                                                                                                                                                                                                                                                                                                                                                                                                                                                                                                                                                            | Feedback LW-NW     | Group Average Negative | -36             | 47  | 31 | Left Frontal Lobe, Middle Frontal Gyrus, BA09/10 | 66   | <0.0001                   | <0.0001                | 7.25    | 6.8     |
| BL                                                                                                                                                                                                                                                                                                                                                                                                                                                                                                                                                                                                                                                                                                                                                                                                                                            | Feedback LW-NW     | Group Average Negative | -12             | -28 | 40 | Left Limbic Lobe, Cingulate Gyrus, BA31          | 28   | <0.0001                   | <0.0001                | 7.37    | 6.9     |
| <b>Abbreviations</b>                                                                                                                                                                                                                                                                                                                                                                                                                                                                                                                                                                                                                                                                                                                                                                                                                          |                    |                        |                 |     |    |                                                  |      |                           |                        |         |         |
| <p><b>BL:</b> Baseline, age 14; <b>FU:</b> Follow-up, age 19; <b>LW:</b> Large Win; <b>NW:</b> No Win; <b>High Group:</b> Scorers in upper 10% of CAPE Total Score, n=149; <b>Low Group:</b> Scorers in lower 10% CAPE Total Score, n=149; <b>High&gt;Low:</b> showing increased activation in the High but not in the Low Group; <b>Low&gt;High:</b> showing increased activation in the Low but not in the High Group; <b>Group Average Positive:</b> showing increased activation in both High and Low Groups; <b>Group Average Negative:</b> showing decreased activation in both High and Low Groups; <b>BA:</b> Brodmann Area; <b>K:</b> number of Voxels; <b>p(FWE-corr):</b> p value corrected for Family Wise Error (false positives); <b>(*):</b> did not survive Bonferoni correction for multiple testing at 0.0125 (0.05/4).</p> |                    |                        |                 |     |    |                                                  |      |                           |                        |         |         |

**eTable 2. MID Study, fROIs Factorial Analysis, Mixed Model 2-Way ANOVA**

|                                                                                                                                                                                              | Type III Sum of Squares | df | Mean Square | F     | Sig.         | r     |
|----------------------------------------------------------------------------------------------------------------------------------------------------------------------------------------------|-------------------------|----|-------------|-------|--------------|-------|
| <b>Caudate ROI [9 8 1] Brain Activation, General Stratification</b>                                                                                                                          |                         |    |             |       |              |       |
| TIME                                                                                                                                                                                         | 1.684                   | 1  | 1.684       | 1.635 | 0.205*       | 0.140 |
| GROUP                                                                                                                                                                                        | 1.100                   | 1  | 1.100       | 2.791 | 0.099*       | 0.181 |
| TIME * GROUP                                                                                                                                                                                 | 1.593                   | 1  | 1.593       | 1.546 | 0.217*       | 0.136 |
| Error(TIME)                                                                                                                                                                                  | 84.455                  | 82 | 1.030       |       |              |       |
| Error(GROUP)                                                                                                                                                                                 | 32.311                  | 82 | 0.394       |       |              |       |
| <b>Frontal ROI [33 41 40] Brain Activation, General Stratification</b>                                                                                                                       |                         |    |             |       |              |       |
| TIME                                                                                                                                                                                         | 7.632                   | 1  | 7.632       | 1.527 | 0.220*       | 0.127 |
| GROUP                                                                                                                                                                                        | 4.108                   | 1  | 4.108       | 3.598 | 0.061*       | 0.193 |
| TIME * GROUP                                                                                                                                                                                 | 37.236                  | 1  | 37.236      | 7.448 | <b>0.008</b> | 0.272 |
| Error(TIME)                                                                                                                                                                                  | 464.966                 | 93 | 5.000       |       |              |       |
| Error(GROUP)                                                                                                                                                                                 | 106.187                 | 93 | 1.142       |       |              |       |
| <b>Frontal ROI [33 44 31] Brain Activation, General Stratification</b>                                                                                                                       |                         |    |             |       |              |       |
| TIME                                                                                                                                                                                         | 25.604                  | 1  | 25.604      | 5.009 | <b>0.028</b> | 0.226 |
| GROUP                                                                                                                                                                                        | 2.323                   | 1  | 2.323       | 1.821 | 0.180*       | 0.139 |
| TIME * GROUP                                                                                                                                                                                 | 8.606                   | 1  | 8.606       | 1.684 | 0.198*       | 0.133 |
| Error(TIME)                                                                                                                                                                                  | 475.398                 | 93 | 5.112       |       |              |       |
| Error(GROUP)                                                                                                                                                                                 | 118.659                 | 93 | 1.276       |       |              |       |
| <b>Frontal ROI [-36 47 31] Brain Activation, General Stratification</b>                                                                                                                      |                         |    |             |       |              |       |
| TIME                                                                                                                                                                                         | 33.354                  | 1  | 33.354      | 5.559 | <b>0.020</b> | 0.237 |
| GROUP                                                                                                                                                                                        | 2.24                    | 1  | 2.24        | 1.77  | 0.187*       | 0.137 |
| TIME * GROUP                                                                                                                                                                                 | 19.871                  | 1  | 19.871      | 3.312 | 0.072*       | 0.185 |
| Error(TIME)                                                                                                                                                                                  | 558.029                 | 93 | 6           |       |              |       |
| Error(GROUP)                                                                                                                                                                                 | 117.68                  | 93 | 1.265       |       |              |       |
| <b>Limbic ROI [-12 -28 40] Brain Activation, General Stratification</b>                                                                                                                      |                         |    |             |       |              |       |
| TIME                                                                                                                                                                                         | 5.911                   | 1  | 5.911       | 1.906 | 0.171*       | 0.142 |
| GROUP                                                                                                                                                                                        | 0.839                   | 1  | 0.839       | 0.801 | 0.373*       | 0.092 |
| TIME * GROUP                                                                                                                                                                                 | 0.086                   | 1  | 0.086       | 0.028 | 0.868*       | 0.017 |
| Error(TIME)                                                                                                                                                                                  | 288.332                 | 93 | 3.100       |       |              |       |
| Error(GROUP)                                                                                                                                                                                 | 97.359                  | 93 | 1.047       |       |              |       |
| <b>Abbreviations</b>                                                                                                                                                                         |                         |    |             |       |              |       |
| df: degrees of Freedom; F: F-ratio; (*): not statistically significant at a p=0.05 level; r: Pearson's correlation coefficient; <b>BL</b> : Baseline, age 14; <b>FU</b> : Follow-up, age 19. |                         |    |             |       |              |       |

**eTable 3. MID Study, Exploratory Cross-Sectional Analysis, Independent T-tests.**

| Time-Point                                                                                                                                                                                                                                                                                           | MNI Coordinates |     |    | Anatomical Area                                  | High Group Mean Brain Activation (Parameter Estimates) | Low Group Mean Brain Activation (Parameter Estimates) | Group Activation Relation | t-test for Equality of Means |     |         |       |
|------------------------------------------------------------------------------------------------------------------------------------------------------------------------------------------------------------------------------------------------------------------------------------------------------|-----------------|-----|----|--------------------------------------------------|--------------------------------------------------------|-------------------------------------------------------|---------------------------|------------------------------|-----|---------|-------|
|                                                                                                                                                                                                                                                                                                      | X               | Y   | Z  |                                                  |                                                        |                                                       |                           | t-test                       | df  | Sig.    | r     |
| BL                                                                                                                                                                                                                                                                                                   | 33              | 41  | 40 | Right Frontal Lobe, Middle Frontal Gyrus, BA09   | -0.986                                                 | 0.134                                                 | L>H                       | -5.069                       | 188 | <0.0001 | 0.346 |
| BL                                                                                                                                                                                                                                                                                                   | 33              | 44  | 31 | Right Frontal Lobe, Middle Frontal Gyrus, BA09   | -1.011                                                 | -0.249                                                | L>H                       | -3.029                       | 188 | 0.003   | 0.215 |
| BL                                                                                                                                                                                                                                                                                                   | -36             | 47  | 31 | Left Frontal Lobe, Middle Frontal Gyrus, BA09/10 | -1.446                                                 | -0.637                                                | L>H                       | -2.818                       | 187 | 0.005   | 0.202 |
| BL                                                                                                                                                                                                                                                                                                   | -12             | -28 | 40 | Left Limbic Lobe, Cingulate Gyrus, BA31          | -0.966                                                 | -0.426                                                | L>H                       | -2.82                        | 169 | 0.005   | 0.212 |
| FU                                                                                                                                                                                                                                                                                                   | 9               | 8   | 1  | Right Caudate Head                               | 0.578                                                  | 0.959                                                 | L>H                       | -2.846                       | 141 | 0.005   | 0.233 |
| <b>Abbreviations</b>                                                                                                                                                                                                                                                                                 |                 |     |    |                                                  |                                                        |                                                       |                           |                              |     |         |       |
| <b>BL:</b> Baseline, age 14; <b>FU:</b> Follow-up, age 19; <b>BA:</b> Brodmann Area; <b>H&gt;L:</b> High Group showing more activation than Low Group; <b>L&gt;H:</b> Low Group showing more activation than High Group; <b>r:</b> Pearson’s correlation coefficient; <b>df:</b> degrees of Freedom. |                 |     |    |                                                  |                                                        |                                                       |                           |                              |     |         |       |

**eTable 4. MID Study, Exploratory Longitudinal Analysis, Paired T-tests.**

| MNI Coordinates |    |    | Anatomical Area                                  | Groups             | Baseline Mean Brain Activation (Parameter Estimates) | Follow-up Mean Brain Activation (Parameter Estimates) | Group Activation Relation | t-test for Equality of Means |    |        |       |
|-----------------|----|----|--------------------------------------------------|--------------------|------------------------------------------------------|-------------------------------------------------------|---------------------------|------------------------------|----|--------|-------|
| X               | Y  | Z  |                                                  |                    |                                                      |                                                       |                           | t-test                       | df | Sig.   | r     |
| -36             | 47 | 31 | Left Frontal Lobe, Middle Frontal Gyrus, BA09/10 | HIGH & LOW General | -1.025                                               | -0.482                                                | FU>BL                     | -2.135                       | 94 | 0.035  | 0.215 |
|                 |    |    |                                                  | HIGH General       | -1.454                                               | -0.397                                                | FU>BL                     | -2.851                       | 41 | 0.007  | 0.407 |
|                 |    |    |                                                  | LOW General        | -0.684                                               | -0.548                                                | FU>BL                     | -0.399                       | 52 | 0.692* | 0.055 |
| 33              | 44 | 31 | Right Frontal Lobe, Middle Frontal Gyrus, BA09   | HIGH & LOW General | -0.711                                               | -0.223                                                | FU>BL                     | -2.094                       | 94 | 0.039  | 0.212 |
|                 |    |    |                                                  | HIGH General       | -1.055                                               | -0.230                                                | FU>BL                     | -2.902                       | 41 | 0.006  | 0.413 |
|                 |    |    |                                                  | LOW General        | -0.437                                               | -0.218                                                | FU>BL                     | -0.629                       | 52 | 0.532* | 0.087 |
| 33              | 41 | 40 | Right Frontal Lobe, Middle Frontal Gyrus, BA09   | HIGH & LOW General | -0.461                                               | -0.248                                                | FU>BL                     | -0.896                       | 94 | 0.373* | 0.092 |
|                 |    |    |                                                  | HIGH General       | -1.046                                               | -0.131                                                | FU>BL                     | -3.18                        | 41 | 0.003  | 0.445 |
|                 |    |    |                                                  | LOW General        | 0.002                                                | -0.342                                                | BL>FU                     | 1.009                        | 52 | 0.318* | 0.138 |

**Abbreviations**  
**BA:** Brodmann Area; **BL:** Baseline, age 14; **FU:** Follow-up, age 19; **BL>FU:** Baseline activation greater than Follow-up activation; **FU>BL:** Follow-up activation greater than Baseline activation; **r:** Pearson’s correlation coefficient; **(\*):** not statistically significant at a p=0.05 level; **df:** degrees of Freedom.  
**High General:** Scorers in upper 10% of CAPE Total Score, n=149; **Low General:** Scorers in lower 10% CAPE Total Score, n=149.



**eTable 5. CANTAB Measures Exploratory Cross-Sectional Analysis, Independent T-Tests.**

| CANTAB Variable              | Timepoint | High Group Mean Score | Low Group Mean Score | Group Scores Relation | t-test for Equality of Means |     |       |       |
|------------------------------|-----------|-----------------------|----------------------|-----------------------|------------------------------|-----|-------|-------|
|                              |           |                       |                      |                       | t-test                       | df  | Sig.  | r     |
| AGN Total Omissions Negative | BL        | 10.052                | 13.177               | L>H                   | -3.021                       | 235 | 0.003 | 0.193 |
| AGN Total Omissions Positive | BL        | 12.035                | 14.645               | L>H                   | -2.817                       | 237 | 0.005 | 0.180 |

**Abbreviations**  
**AGN Total Omissions Negative/Positive:** Affective Go-NoGo Task, total number of missed responses to targets in the blocks specified by the value of target type (negative, positive); **CGT Risk Adjustment:** Cambridge Gambling Task, tendency to get higher proportions of points when the large majority of boxes are the colour chosen; **H>L:** High Group showing greater scores than Low Group; **L>H:** Low Group showing greater scores than High Group; **r:** Pearson’s correlation coefficient; **BL:** Baseline, age 14; **FU:** Follow-up, age 19; **df:** degrees of Freedom.

**eTable 6. CANTAB Measures Exploratory Longitudinal Analysis, Paired T-Tests.**

| CANTAB Variable              | Group | Baseline Mean Score | Follow-up Mean Score | Group Scores Relation | t-test for Equality of Means |     |         |       |
|------------------------------|-------|---------------------|----------------------|-----------------------|------------------------------|-----|---------|-------|
|                              |       |                     |                      |                       | t-test                       | df  | Sig.    | r     |
| AGN Total Omissions Negative | ALL   | 11.899              | 6.647                | BL>FU                 | 18.932                       | 781 | <0.0001 | 0.561 |
|                              | HIGH  | 10.065              | 6.688                | BL>FU                 | 3.745                        | 76  | <0.0001 | 0.395 |
|                              | LOW   | 12.369              | 7.095                | BL>FU                 | 6.385                        | 83  | <0.0001 | 0.574 |
| AGN Total Omissions Positive | ALL   | 13.787              | 8.551                | BL>FU                 | 19.853                       | 781 | <0.0001 | 0.579 |
|                              | HIGH  | 12.195              | 8.273                | BL>FU                 | 4.529                        | 76  | <0.0001 | 0.461 |
|                              | LOW   | 14.274              | 8.964                | BL>FU                 | 6.352                        | 83  | <0.0001 | 0.572 |

**Abbreviations**  
**AGN Total Omissions Negative/Positive:** Affective Go-NoGo Task, total number of missed responses to targets in the blocks specified by the value of target type (negative, positive); **CGT Risk Adjustment:** Cambridge Gambling Task, tendency to get higher proportions of points when the large majority of boxes are the colour chosen; **BL>FU:** Mean Scores greater at BL; **FU>BL:** Mean Scores greater at FU; **r:** Pearson's correlation coefficient; **BL:** Baseline, age 14; **FU:** Follow-up, age 19; **ALL:** Whole sample, n=1,434; **df:** degrees of Freedom.

**eFigure 4. CANTAB Measures: Mean AGN Total Omissions Positive and Negative Stimuli Scores at age 14 and 19;** statistically significant changes at  $p=0.05$  level for both the High and Low PLEs Group, SE bars are displayed

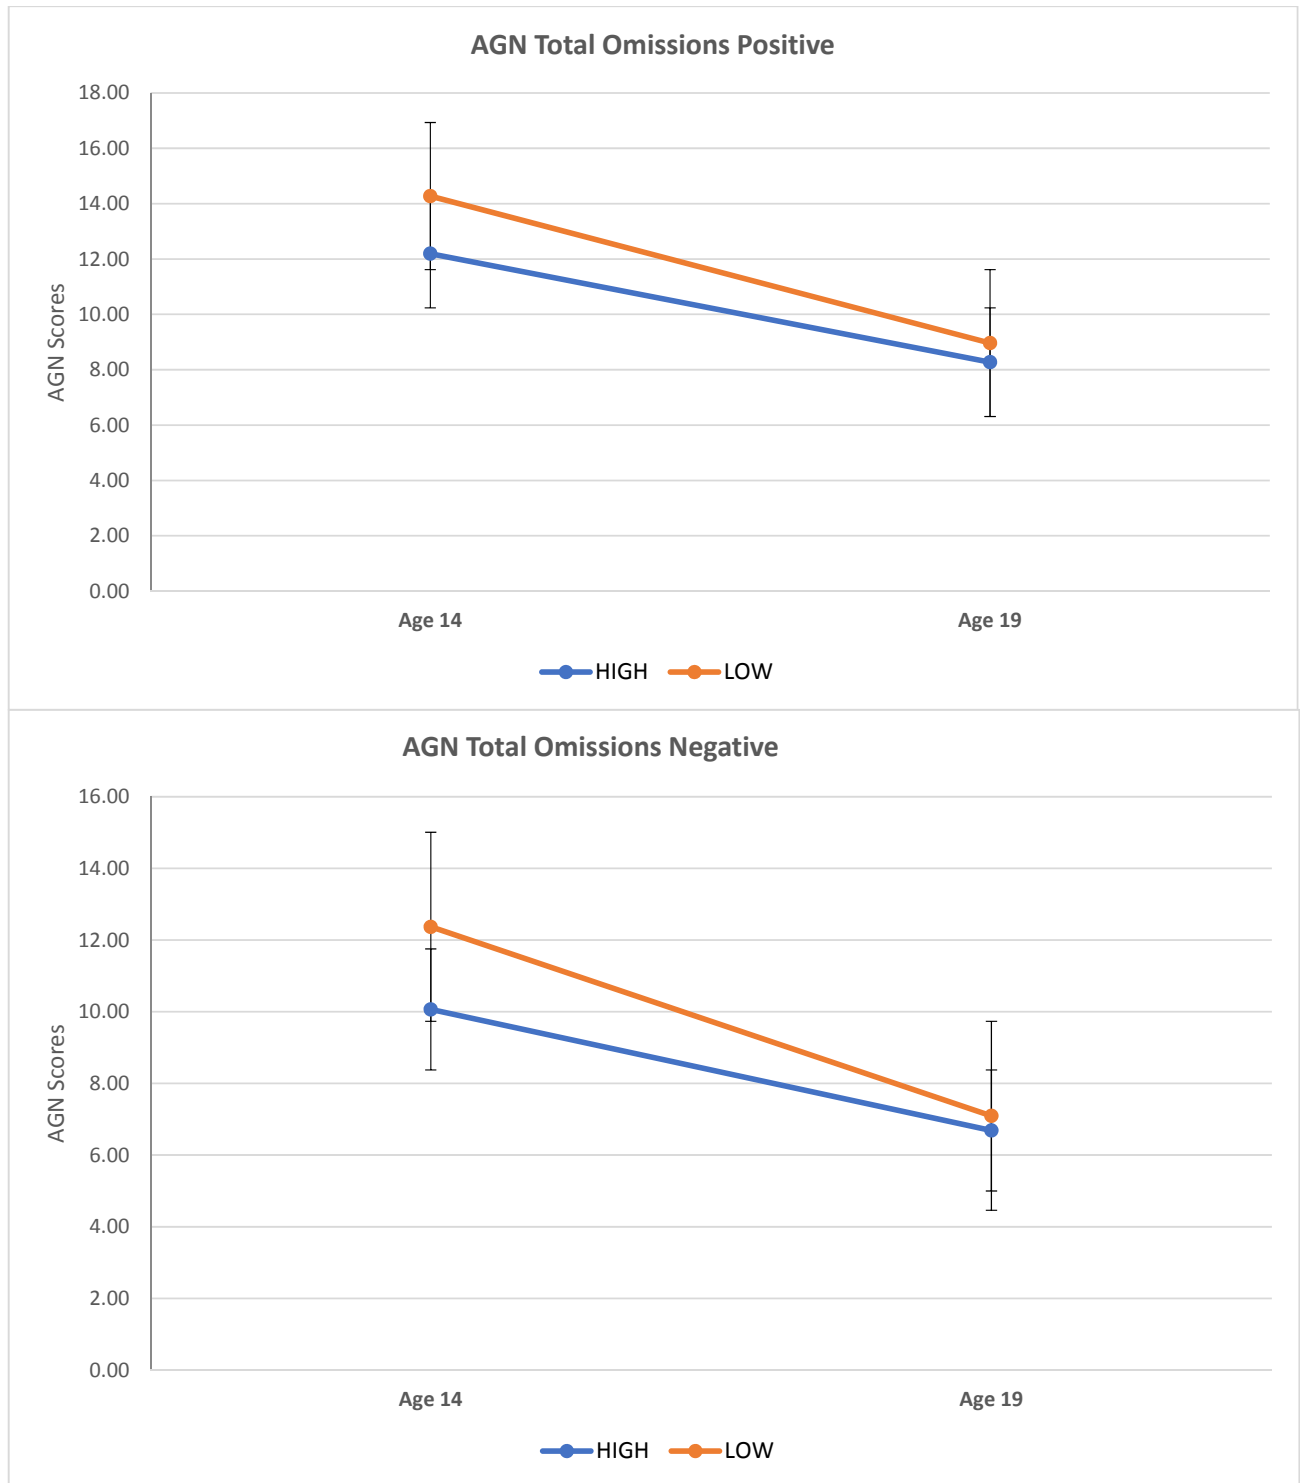

Supplement: jamapsychiatry-75-1043-s001.pdf [file jamapsychiatry-75-1043-s001.pdf]
